# Supplementary material
Source: Royal Society of Chemistry journal article supplement (doi:10.1039/d6ta00954a)
Supplement: d6ta00954a1.pdf [file d6ta00954a1.pdf]

## Supplementary Information

### **H<sub>2</sub>-SCR at high water concentrations with *in situ* generated NH<sub>3</sub> for efficient removal of NO<sub>x</sub> from H<sub>2</sub> engines**

Jieling Shao, Prabin Dhakal, Rawipa Intakul, Xuan Huy Le, Phuoc Hoang Ho, Derek  
Creaser, and Louise Olsson\*

*<sup>1</sup>Chemistry and Chemical Engineering, Competence Centre of Catalysis, Chalmers University of  
Technology, SE-412 96 Gothenburg, Sweden*

\*Corresponding author

Email: [louise.olsson@chalmers.se](mailto:louise.olsson@chalmers.se)

## Experimental

### Synthesis of Na-SSZ-13

Firstly, a synthesis gel was prepared with the molar composition of  $0.1 \text{ Na}_2\text{O} : 1 \text{ SiO}_2 : 0.025 \text{ Al}_2\text{O}_3 : 0.2 \text{ N,N,N-trimethyl-1-adamantylammonium hydroxide (TMAOH)} : 44 \text{ H}_2\text{O}$ .<sup>1</sup> Sodium hydroxide (VMR Chemicals), aluminium hydroxide hydrate (Sigma-Aldrich), and fumed silica (Sigma-Aldrich) were used as sodium, aluminium and silica sources, respectively. TMAOH (TCI) was used as a template to promote the formation of the Chabazite (CHA) framework. After the mixture was stirred and aged overnight, a uniform gel was obtained. The gel was then transferred to a Teflon-lined stainless-steel autoclave and crystallized at  $160 \text{ }^\circ\text{C}$  for 6 days in a rotating oven. The resulting solid product was recovered by filtration, washed several times with Milli-Q water, and dried at  $80 \text{ }^\circ\text{C}$  for 12 h. The dried material was subsequently ground into a powder and calcined at  $600 \text{ }^\circ\text{C}$  for 8 h to remove the organic template. The Na-form SSZ-13 was obtained after calcination.

## Results and Discussions

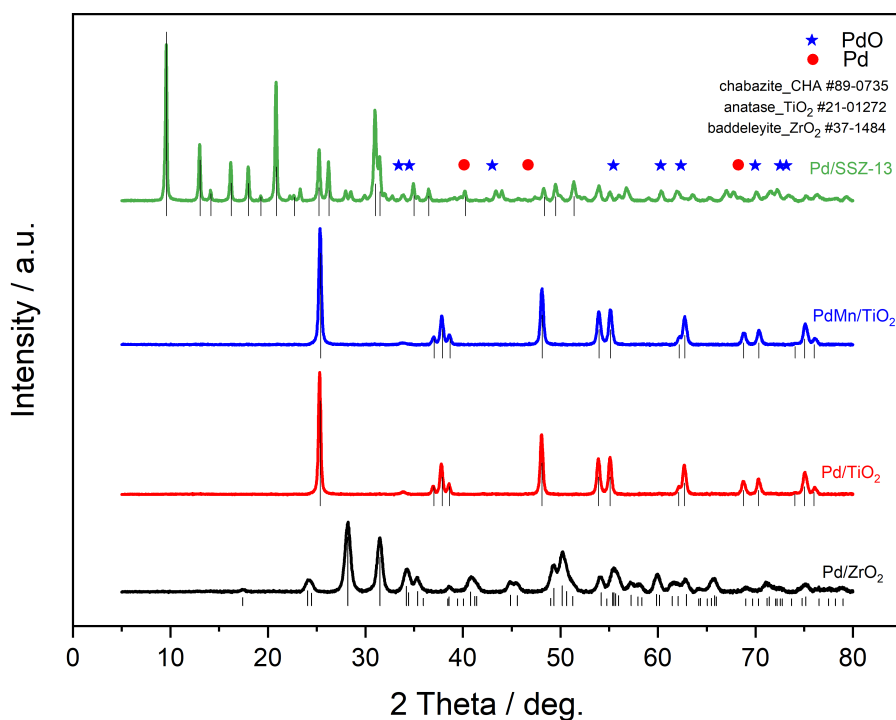

**Fig. S1.** XRD patterns of pre-treated 1 wt% Pd catalysts.

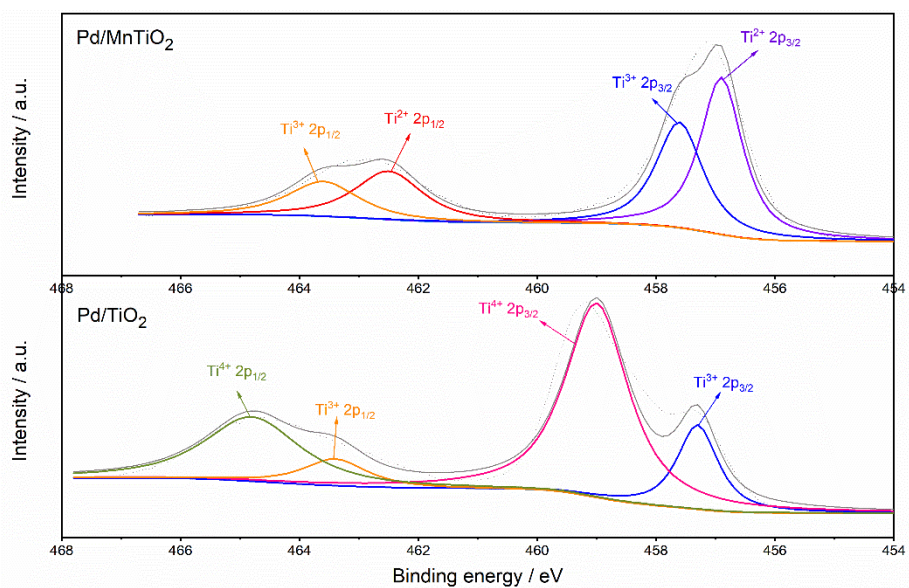

**Fig. S2.** XPS of Ti2p for pre-treated Pd/TiO<sub>2</sub> and Pd/MnTiO<sub>2</sub> catalysts.

**Table S1.** X-ray photoelectron spectroscopy of the TiO<sub>2</sub> supported catalysts.

| Sample                | Ti <sup>2+</sup>                                     |            | Ti <sup>3+</sup>                                     |                | Ti <sup>4+</sup>                                     |                |
|-----------------------|------------------------------------------------------|------------|------------------------------------------------------|----------------|------------------------------------------------------|----------------|
|                       | BE/eV<br>(Ti2p <sub>3/2</sub> /Ti2p <sub>1/2</sub> ) | Fraction/% | BE/eV<br>(Ti2p <sub>3/2</sub> /Ti2p <sub>1/2</sub> ) | Fraction/<br>% | BE/eV<br>(Ti2p <sub>3/2</sub> /Ti2p <sub>1/2</sub> ) | Fraction/<br>% |
| Pd/TiO <sub>2</sub>   |                                                      |            | 457.3/463.4                                          | 21.9           | 459.0/464.8                                          | 78.1           |
| Pd/MnTiO <sub>2</sub> | 456.8/462.5                                          | 57.3       | 457.6/463.6                                          | 42.7           |                                                      |                |

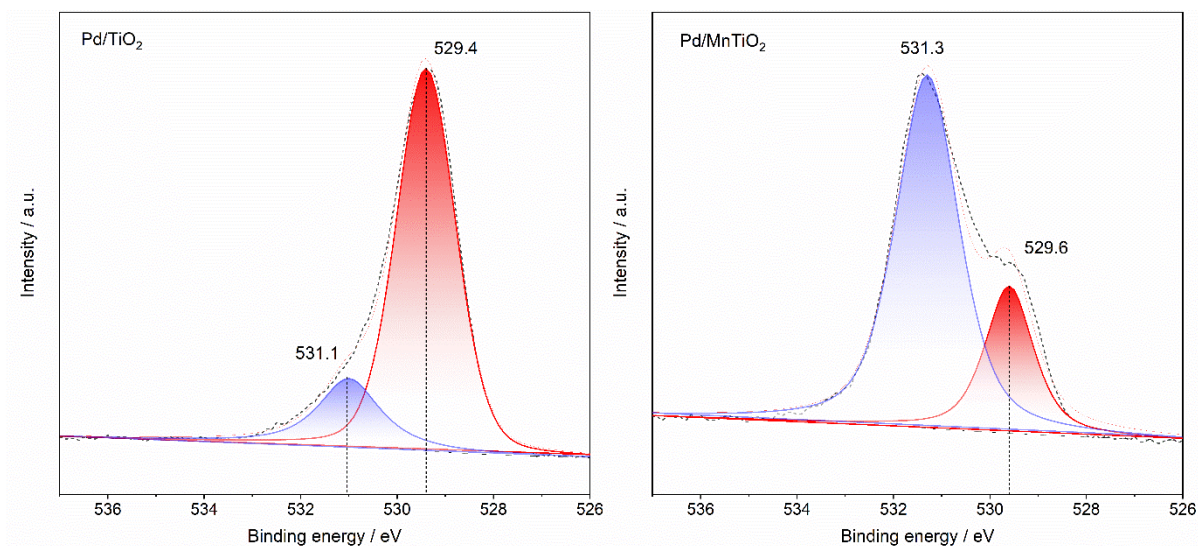

**Fig. S3.** XPS of O1s in pre-treated Pd/TiO<sub>2</sub> and Pd/MnTiO<sub>2</sub> catalysts.

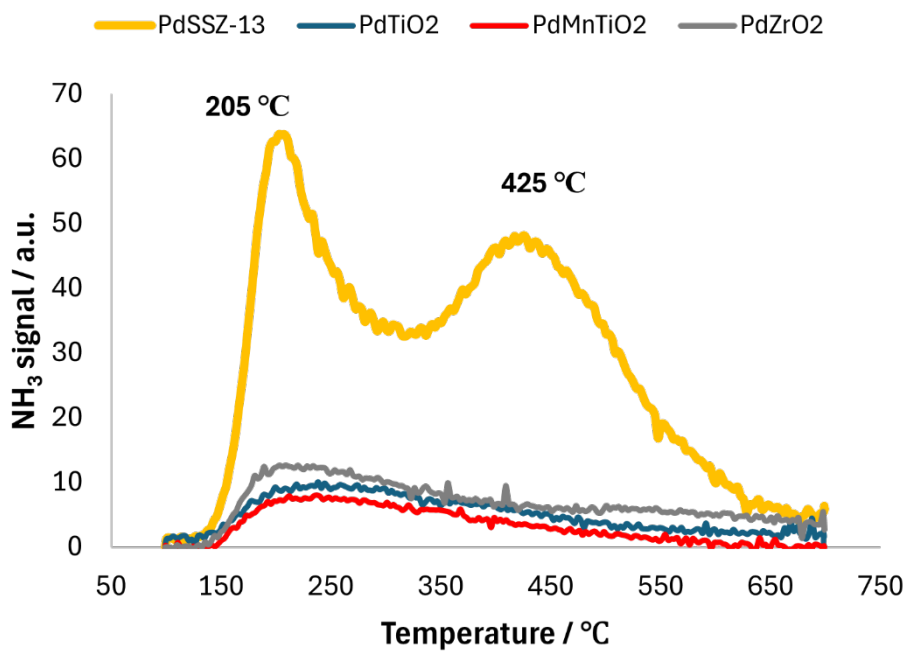

**Fig. S4.** NH<sub>3</sub>-Temperature Programmed Desorption (TPD) profiles for the Pd catalysts.

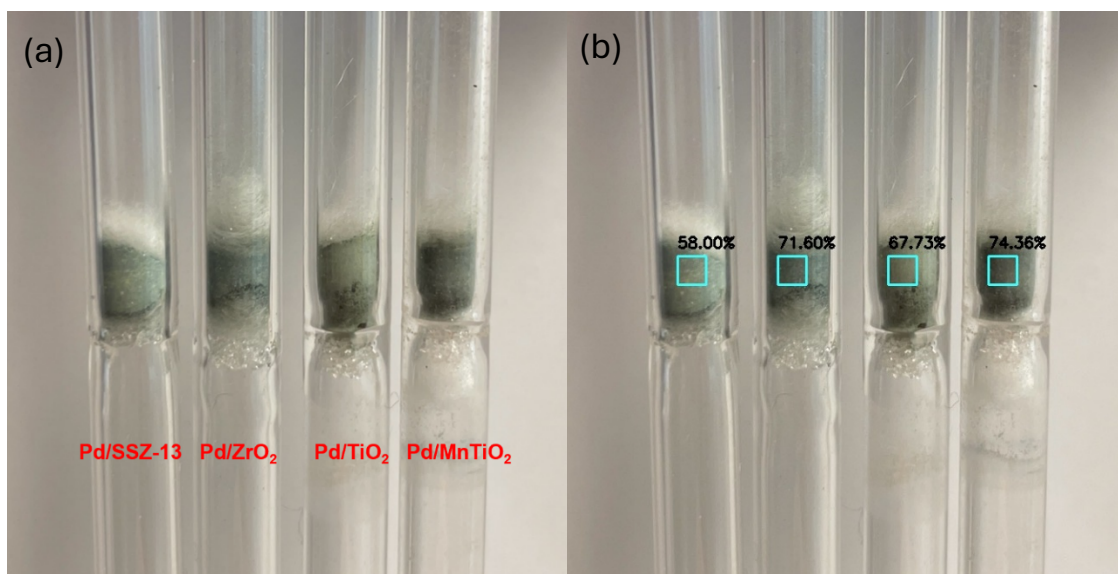

**Fig. S5** Images of the sample mixtures (weight ratio: catalyst/ $\text{WO}_x=1/8$ ) after  $\text{H}_2$  treatment at  $200^\circ\text{C}$  for 1h. (a) original (b) The RGB color components were extracted from the image, and the average proportion of the blue channel are shown. For info, the  $\text{WO}_x$  has a yellow color.

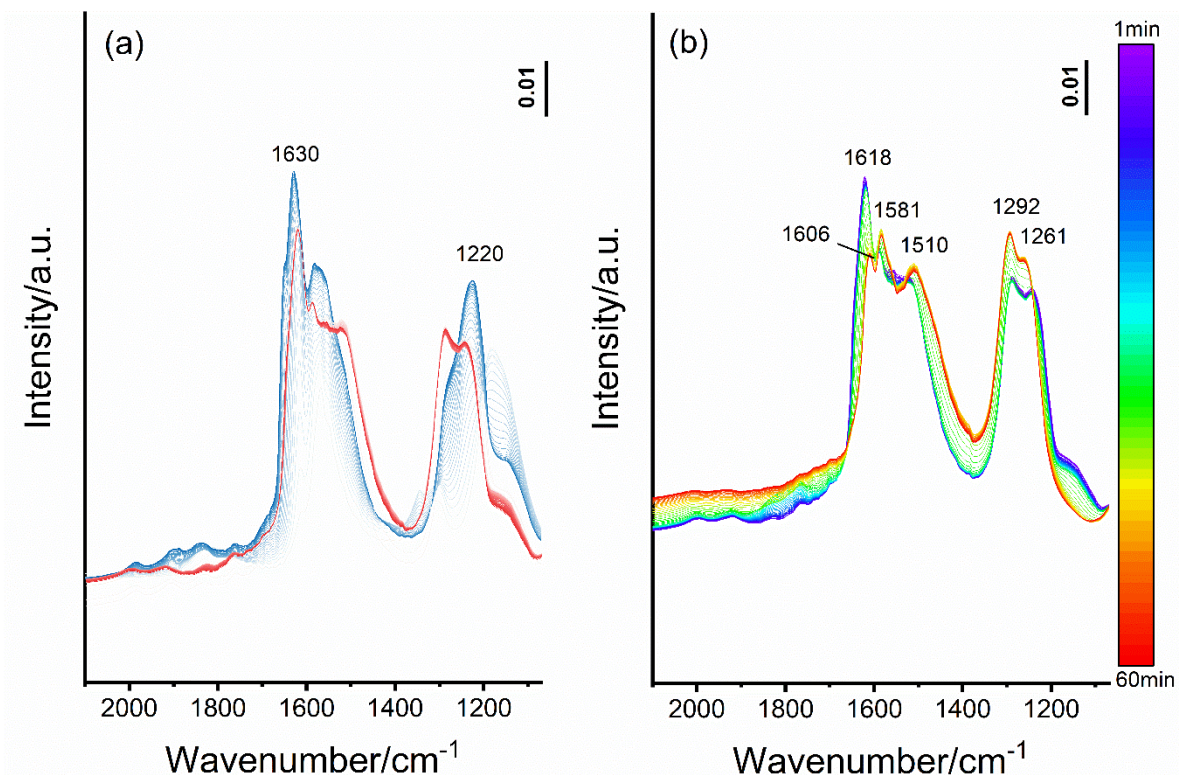

**Fig. S6.** In situ DRIFTS spectra at  $80^\circ\text{C}$  of (a) 500 ppm NO for 0.5h (blue) and then 500 ppm NO + 1%  $\text{H}_2\text{O}$  for 1h(red); and (b) 2000 ppm  $\text{H}_2$  exposure for 1h after flowing 500 ppm NO + 1%  $\text{H}_2\text{O}$ .

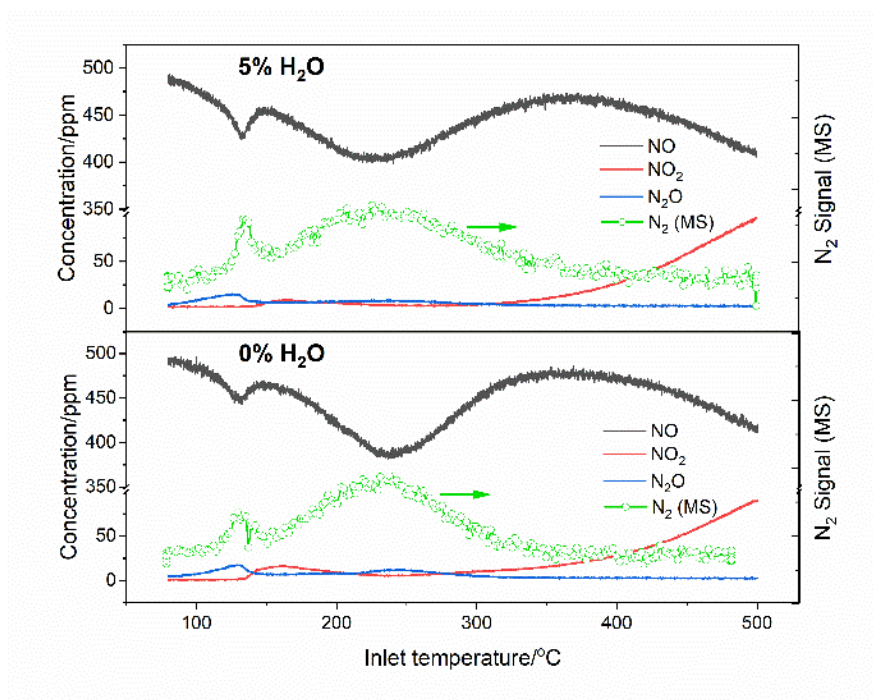

**Fig. S7.** Comparison of NO/NO<sub>2</sub>/N<sub>2</sub>O concentrations from IR and N<sub>2</sub> signal from MS for Pd/SSZ-13 catalyst with and without water.

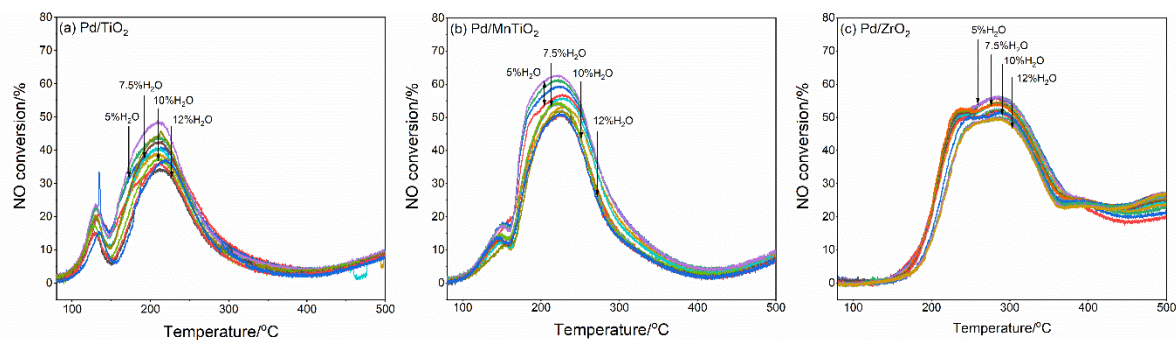

**Fig. S8.** NO conversion profiles for all cycles with varying water content (a) 1 wt% Pd/TiO<sub>2</sub>, (b) 1 wt% Pd/MnTiO<sub>2</sub>, (c) 1 wt% Pd/ZrO<sub>2</sub> (GHSV=20,000 h<sup>-1</sup>(STP); gas inlet: 500 ppm NO, 5000 ppm H<sub>2</sub>, 10% O<sub>2</sub>, and 5/7.5/10/12% H<sub>2</sub>O balanced in Ar; 80-500 °C with heating rate of 5 °C min<sup>-1</sup>).

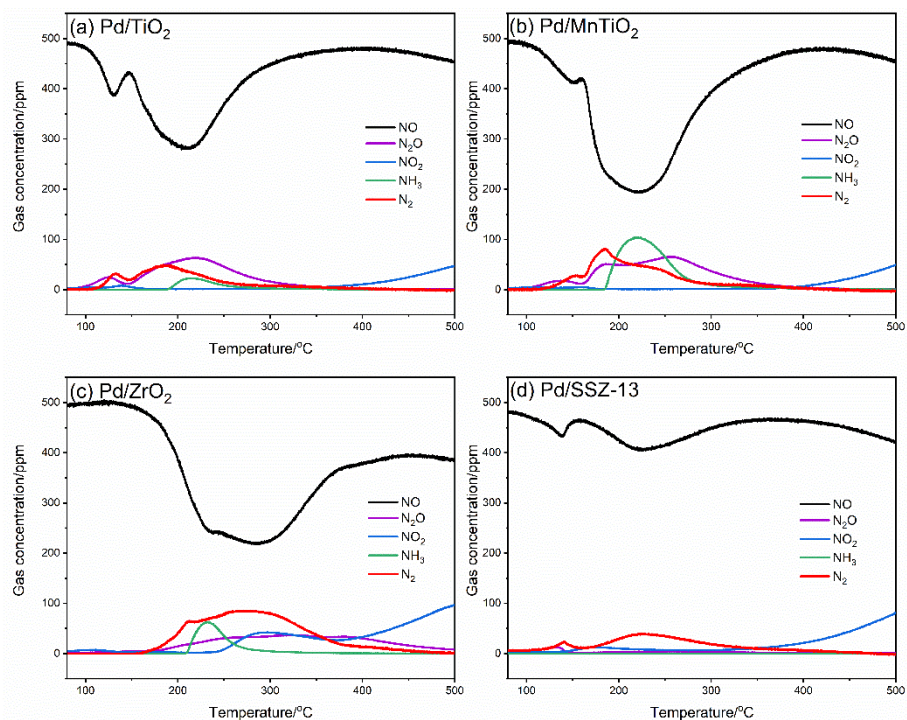

**Fig. S9.** The effluent gas concentration profiles of Pd catalysts with 5% water content from 80-500 °C for (a) Pd/TiO<sub>2</sub>, (b) Pd/MnTiO<sub>2</sub>, (c) Pd/ZrO<sub>2</sub> and (d) Pd/SSZ-13.

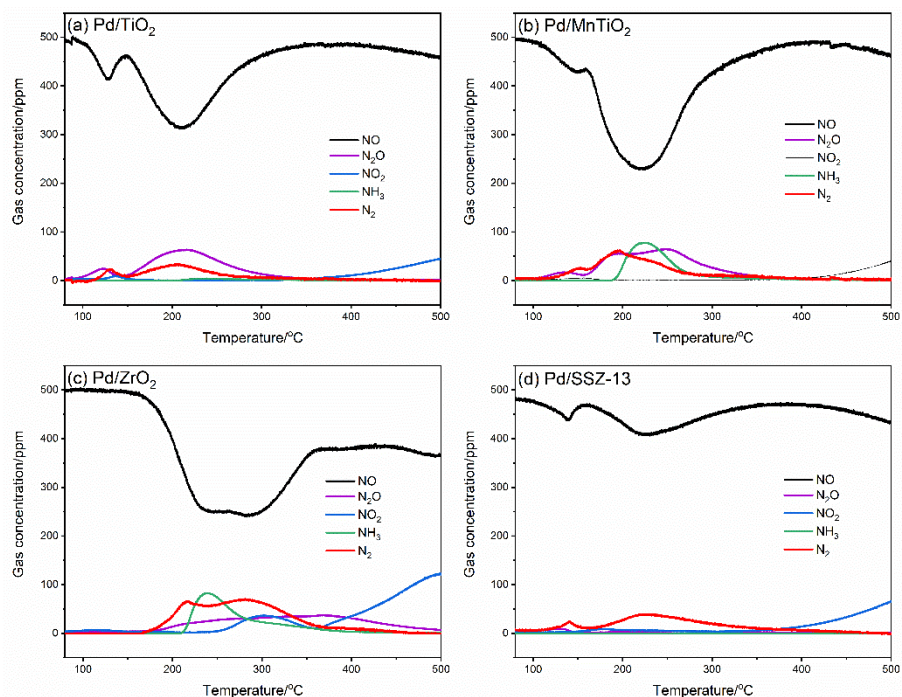

**Fig. S10.** The effluent gas concentration profiles of Pd catalysts with 10% water content during temperature ramp from 80-500 °C; (a) Pd/TiO<sub>2</sub>, (b) Pd/MnTiO<sub>2</sub>, (c) Pd/ZrO<sub>2</sub> catalysts, and (d) Pd/SSZ-13 catalyst.

## References

1. Z. Li, M. T. Navarro, J. Martínez-Triguero, J. Yu and A. Corma, *Catal. Sci. Technol.*, 2016, 6, 5856-5863.
